# Supplementary material
Source: PubMed Central journal article supplement (PMC6821218)
Supplement: awz277_supplementary_data.pdf [file awz277_supplementary_data.pdf]

# Supplementary Material

## Contents

|                                                                                                                                                                    |    |
|--------------------------------------------------------------------------------------------------------------------------------------------------------------------|----|
| Supplementary Table 1: Demographic and pathological data by TDP-43 stages. ....                                                                                    | 2  |
| Supplementary Table 2: R-squared and adjusted r-squared from the robust regressions assessing the effect of pathological variables on gray matter volume. ....     | 4  |
| Supplementary Table 3: Between TDP-43 stages differences in gray matter volume. ....                                                                               | 5  |
| Supplementary Table 4: Effect of diffuse and neuritic $\beta$ -amyloid plaques, argyrophilic grain disease and vascular pathology on gray matter volume. ....      | 6  |
| Supplementary Figure 1: Pathological TDP-43 staging in cases with TDP-43 inclusions. ....                                                                          | 7  |
| Supplementary Figure 2: Effect of pathological TDP-43 stages on gray matter volume using a match sample of TDP-43 negative group. ....                             | 8  |
| Supplementary Figure 3: Results of voxel-wise robust regressions showing the significant differences of gray matter volume between TDP-43 stages. ....             | 9  |
| Supplementary Figure 4: Results of voxel-wise robust regressions showing the effect of Braak stages on gray matter volume. ....                                    | 10 |
| Supplementary Figure 5: Results of voxel-wise robust regressions showing the effect of Lewy Body stages and argyrophilic grain disease on gray matter volume. .... | 11 |

**Supplementary Table 1: Demographic and pathological data by TDP-43 stages.**

|                                   | <b>TDP-43<br/>Negative<br/>(N=252)</b> | <b>TDP-43<br/>Stage 1<br/>(N=34)</b> | <b>TDP-43<br/>Stage 2<br/>(N=32)</b> | <b>TDP-43<br/>Stage 3<br/>(N=14)</b> | <b>TDP-43<br/>Stage 4+<br/>(N=75)</b> | <b>p value</b>      | <b>Post hoc test</b>                         |
|-----------------------------------|----------------------------------------|--------------------------------------|--------------------------------------|--------------------------------------|---------------------------------------|---------------------|----------------------------------------------|
| <b>Gender (Female/Male)</b>       | 105/147                                | 17/17                                | 22/10                                | 9/5                                  | 39/36                                 | 0.021               | <i>ns</i>                                    |
| <b>Education (years)</b>          | 14.5±3.1                               | 15.0±3.2                             | 14.5±3.3                             | 15.3±2.5                             | 14.3±3.1                              | 0.749               | <i>ns</i>                                    |
| <b>Age at MRI (years)</b>         | 78.4±10.6                              | 82.4±7.7                             | 80.1±8.1                             | 84.7±9.6                             | 83.5±7.3                              | <0.001              | TDP 0 < TDP 4                                |
| <b>Age at death (years)</b>       | 81.8±10.8                              | 84.8±7.7                             | 85.3±9.1                             | 88.2±9.9                             | 87.4±7.5                              | <0.001              | TDP 0 < TDP 4                                |
| <b>Time MRI to death (years)</b>  | 3.4±2.3                                | 2.4±2.0                              | 5.2±2.6                              | 3.5±2.6                              | 3.8±2.3                               | <0.001              | (TDP 0, TDP 1, TDP 4) < TDP 2; TDP 1 < TDP 4 |
| <b>Clinical Status (CUI/CI)</b>   | 85/166                                 | 9/25                                 | 6/26                                 | 2/12                                 | 8/67                                  | 0.001               | TDP 0 versus TDP 4                           |
| <b>APOE ε4 carrier</b>            | 101 (40.2%)                            | 23 (67.6%)                           | 17 (53.1%)                           | 10 (71.4%)                           | 39 (52.0%)                            | 0.005               | TDP 0 versus TDP 1                           |
| <b>Braak Stage</b>                |                                        |                                      |                                      |                                      |                                       | <0.001 <sup>a</sup> | TDP 0 versus (TDP 2, TDP 4)                  |
| <b>0-II</b>                       | 58 (23.0%)                             | 6 (17.6%)                            | 0 (0.0%)                             | 1 (7.1%)                             | 6 (8.0%)                              |                     |                                              |
| <b>III</b>                        | 33 (13.1%)                             | 1 (2.9%)                             | 1 (3.1%)                             | 2 (14.3%)                            | 6 (8.0%)                              |                     |                                              |
| <b>VI</b>                         | 43 (17.1%)                             | 3 (8.8%)                             | 2 (6.2%)                             | 1 (7.1%)                             | 9 (12.0%)                             |                     |                                              |
| <b>V</b>                          | 36 (14.3%)                             | 12 (35.3%)                           | 15 (46.9%)                           | 4 (28.6%)                            | 19 (25.3%)                            |                     |                                              |
| <b>VI</b>                         | 82 (32.5%)                             | 12 (35.3%)                           | 14 (43.8%)                           | 6 (42.9%)                            | 35 (46.7%)                            |                     |                                              |
| <b>Neuritic Plaques</b>           |                                        |                                      |                                      |                                      |                                       | 0.001 <sup>a</sup>  | TDP 2 versus (TDP 0, TDP 1, TDP 3, TDP 4)    |
| <b>0</b>                          | 45 (17.9%)                             | 7 (20.6%)                            | 2 (6.2%)                             | 1 (7.1%)                             | 11 (14.7%)                            |                     |                                              |
| <b>1</b>                          | 47 (18.7%)                             | 3 (8.8%)                             | 3 (9.4%)                             | 0 (0.0%)                             | 5 (6.7%)                              |                     |                                              |
| <b>2</b>                          | 53 (21.0%)                             | 10 (29.4%)                           | 2 (6.2%)                             | 6 (42.9%)                            | 22 (29.3%)                            |                     |                                              |
| <b>3</b>                          | 107 (42.5%)                            | 14 (41.2%)                           | 25 (78.1%)                           | 7 (50.0%)                            | 37 (49.3%)                            |                     |                                              |
| <b>Diffuse Plaques</b>            |                                        |                                      |                                      |                                      |                                       | 0.124 <sup>a</sup>  | <i>ns</i>                                    |
| <b>0</b>                          | 18 (7.1%)                              | 2 (5.9%)                             | 1 (3.1%)                             | 1 (7.1%)                             | 6 (8.0%)                              |                     |                                              |
| <b>1</b>                          | 17 (6.7%)                              | 3 (8.8%)                             | 0 (0.0%)                             | 0 (0.0%)                             | 6 (8.0%)                              |                     |                                              |
| <b>2</b>                          | 42 (16.7%)                             | 5 (14.7%)                            | 1 (3.1%)                             | 4 (28.6%)                            | 4 (5.3%)                              |                     |                                              |
| <b>3</b>                          | 175 (69.4%)                            | 24 (70.6%)                           | 30 (93.8%)                           | 9 (64.3%)                            | 59 (78.7%)                            |                     |                                              |
| <b>Lewy Body Stage</b>            |                                        |                                      |                                      |                                      |                                       | 0.013 <sup>a</sup>  | <i>ns</i>                                    |
| <b>0</b>                          | 165 (65.5%)                            | 25 (73.5%)                           | 14 (43.8%)                           | 5 (35.7%)                            | 44 (58.7%)                            |                     |                                              |
| <b>1</b>                          | 12 (4.8%)                              | 0 (0.0%)                             | 3 (9.4%)                             | 0 (0.0%)                             | 2 (2.7%)                              |                     |                                              |
| <b>2</b>                          | 24 (9.5%)                              | 3 (8.8%)                             | 8 (25.0%)                            | 1 (7.1%)                             | 9 (12.0%)                             |                     |                                              |
| <b>3</b>                          | 36 (14.3%)                             | 5 (14.7%)                            | 7 (21.9%)                            | 4 (28.6%)                            | 14 (18.7%)                            |                     |                                              |
| <b>4</b>                          | 15 (6.0%)                              | 1 (2.9%)                             | 0 (0.0%)                             | 4 (28.6%)                            | 6 (8.0%)                              |                     |                                              |
| <b>Argyrophilic grain disease</b> |                                        |                                      |                                      |                                      |                                       | 0.485               | <i>ns</i>                                    |
| <b>0</b>                          | 215 (85.3%)                            | 28 (82.4%)                           | 30 (93.8%)                           | 13 (92.9%)                           | 68 (90.7%)                            |                     |                                              |
| <b>1</b>                          | 37 (14.7%)                             | 6 (17.6%)                            | 2 (6.2%)                             | 1 (7.1%)                             | 7 (9.3%)                              |                     |                                              |

|                           |             |            |            |            |            |                    |    |
|---------------------------|-------------|------------|------------|------------|------------|--------------------|----|
| <b>Vascular pathology</b> |             |            |            |            |            | 0.422 <sup>a</sup> | ns |
| <b>0</b>                  | 144 (57.1%) | 14 (41.2%) | 18 (56.2%) | 10 (71.4%) | 39 (52.0%) |                    |    |
| <b>1</b>                  | 85 (33.7%)  | 16 (47.1%) | 13 (40.6%) | 3 (21.4%)  | 32 (42.7%) |                    |    |
| <b>2</b>                  | 23 (9.1%)   | 4 (11.8%)  | 1 (3.1%)   | 1 (7.1%)   | 4 (5.3%)   |                    |    |

---

Unless otherwise indicated, values are mean  $\pm$  standard deviation. *P* values refer to analyses of chi-squared (or exact Fisher if appropriate) and ANOVA (followed by Tukey post-hoc tests) for categorical and continuous variables respectively. Refer to Methods for further details about the Braak, TDP-43 and Lewy body stages. <sup>a</sup> *p*-value estimated using a permutation chi-squared test, with 2000 permutations.

**Supplementary Table 2: R-squared and adjusted r-squared from the robust regressions assessing the effect of pathological variables on gray matter volume.**

|                            | <b>r-squared</b> | <b>Adjusted r-squared</b> |
|----------------------------|------------------|---------------------------|
| <b>Amygdala L</b>          | 0.49             | 0.46                      |
| <b>Amygdala R</b>          | 0.46             | 0.43                      |
| <b>Entorhinal Cortex L</b> | 0.56             | 0.54                      |
| <b>Entorhinal Cortex R</b> | 0.52             | 0.49                      |
| <b>Hippocampus L</b>       | 0.57             | 0.55                      |
| <b>Hippocampus R</b>       | 0.5              | 0.47                      |
| <b>Fusiform L</b>          | 0.56             | 0.53                      |
| <b>Fusiform R</b>          | 0.52             | 0.49                      |
| <b>Insula L</b>            | 0.52             | 0.49                      |
| <b>Insula R</b>            | 0.54             | 0.51                      |
| <b>Temporal Inferior L</b> | 0.58             | 0.56                      |
| <b>Temporal Inferior R</b> | 0.53             | 0.5                       |
| <b>Frontal Middle L</b>    | 0.36             | 0.32                      |
| <b>Frontal Middle R</b>    | 0.36             | 0.33                      |

**Supplementary Table 3: Between TDP-43 stages differences in gray matter volume.**

|                            | TDP Stage 1 versus Stage 2 | TDP Stage 1 versus Stage 3 | TDP Stage 1 versus Stage 4+           | TDP Stage 2 versus Stage 3  | TDP Stage 2 versus Stage 4+ | TDP Stage 3 versus Stage 4+ |
|----------------------------|----------------------------|----------------------------|---------------------------------------|-----------------------------|-----------------------------|-----------------------------|
| <b>Amygdala L</b>          | 2 [-4.9, 9.4], p=0.58      | 5.6 [-3.2, 15.3], p=0.22   | 1.8 [-4, 7.8], p=0.55                 | 3.6 [-5.2, 13.2], p=0.44    | -0.2 [-5.9, 5.9], p=0.94    | -3.6 [-11, 4.3], p=0.36     |
| <b>Amygdala R</b>          | 5.1 [-2.3, 13.1], p=0.18   | 0.6 [-8.2, 10.3], p=0.89   | 1.9 [-4.1, 8.2], p=0.55               | -4.3 [-12.8, 5.2], p=0.36   | -3.1 [-9, 3.2], p=0.33      | 1.2 [-6.9, 10.1], p=0.77    |
| <b>Entorhinal Cortex L</b> | -3.9 [-12.8, 5.8], p=0.42  | -1.9 [-13, 10.6], p=0.75   | -4.3 [-11.5, 3.5], p=0.27             | 2.1 [-9.8, 15.5], p=0.74    | -0.4 [-8.3, 8.2], p=0.92    | -2.4 [-12.6, 8.8], p=0.66   |
| <b>Entorhinal Cortex R</b> | -1 [-9.5, 8.3], p=0.83     | -6.9 [-16.7, 4.1], p=0.21  | -4.5 [-11.2, 2.8], p=0.22             | -6 [-16.2, 5.5], p=0.29     | -3.5 [-10.7, 4.3], p=0.37   | 2.6 [-7.3, 13.6], p=0.62    |
| <b>Hippocampus L</b>       | -4 [-10.3, 2.7], p=0.23    | -8.2 [-15.5, -0.1], p=0.05 | <b>-9.6 [-14.5, -4.5], p&lt;0.001</b> | -4.3 [-12.2, 4.2], p=0.31   | -5.8 [-11.1, -0.2], p=0.04  | -1.6 [-8.8, 6.2], p=0.68    |
| <b>Hippocampus R</b>       | -2.2 [-9.2, 5.5], p=0.57   | -12.2 [-20, -3.6], p=0.007 | <b>-9.2 [-14.6, -3.4], p=0.002</b>    | -10.2 [-18.4, -1.2], p=0.03 | -7.2 [-13, -1], p=0.02      | 3.4 [-5, 12.5], p=0.44      |
| <b>Fusiform L</b>          | -2.9 [-9.4, 4], p=0.40     | -5.8 [-13.6, 2.7], p=0.18  | -3.2 [-8.4, 2.4], p=0.26              | -2.9 [-11.2, 6.1], p=0.51   | -0.2 [-6, 5.8], p=0.94      | 2.8 [-5, 11.1], p=0.49      |
| <b>Fusiform R</b>          | -2.8 [-9.3, 4.1], p=0.42   | -6.1 [-13.8, 2.3], p=0.15  | 0.4 [-5.1, 6.2], p=0.89               | -3.4 [-11.5, 5.5], p=0.44   | 3.3 [-2.6, 9.5], p=0.27     | 6.9 [-1, 15.6], p=0.09      |
| <b>Insula L</b>            | -3.3 [-8.4, 2], p=0.22     | -5.2 [-11.4, 1.4], p=0.12  | -4.4 [-8.5, -0.1], p=0.04             | -1.9 [-8.5, 5.1], p=0.58    | -1.1 [-5.6, 3.5], p=0.63    | 0.8 [-5.2, 7.2], p=0.79     |
| <b>Insula R</b>            | -4.3 [-9.1, 0.8], p=0.10   | -6.2 [-12, 0.1], p=0.05    | -4 [-8, 0.1], p=0.05                  | -2 [-8.2, 4.7], p=0.55      | 0.3 [-4, 4.8], p=0.90       | 2.3 [-3.5, 8.4], p=0.45     |
| <b>Temporal Inf L</b>      | -5.8 [-12.1, 1], p=0.09    | -3 [-11.1, 5.9], p=0.50    | -4.9 [-10.2, 0.7], p=0.09             | 3 [-5.8, 12.6], p=0.52      | 0.9 [-4.8, 7.1], p=0.75     | -2 [-9.4, 6.1], p=0.62      |
| <b>Temporal Inf R</b>      | -2.6 [-9.3, 4.6], p=0.47   | -3.3 [-11.5, 5.7], p=0.46  | -0.2 [-5.8, 5.7], p=0.94              | -0.7 [-9.3, 8.8], p=0.88    | 2.4 [-3.6, 8.9], p=0.44     | 3.2 [-4.8, 11.7], p=0.45    |
| <b>Frontal Mid L</b>       | -4.5 [-13.2, 5.1], p=0.35  | -4.5 [-15.3, 7.6], p=0.45  | -2.5 [-9.8, 5.5], p=0.53              | -0.1 [-11.6, 13], p=0.99    | 2.1 [-5.9, 10.8], p=0.61    | 2.2 [-8.3, 13.9], p=0.70    |
| <b>Frontal Mid R</b>       | -6.5 [-14.5, 2.4], p=0.15  | -7.8 [-17.8, 3.3], p=0.16  | -2.8 [-9.8, 4.7], p=0.45              | -1.5 [-12.3, 10.6], p=0.80  | 3.9 [-3.8, 12.1], p=0.33    | 5.4 [-4.9, 16.9], p=0.31    |

*Results of the robust regressions showing the effect of TDP-43 stages on gray matter volume. Values represent the percentage of volume change [95% CIs] associated with the different TDP-43 stages compare to TDP-43 stage 1 (columns 1-3), TDP-43 stage 2 (columns 4-5) and TDP-43 stage 3 (columns 6). Results in bold survived Bonferroni correction for multiple comparisons (red,  $\alpha=0.05$ ,  $p<0.004$ , 14 models considered). L: left; R: right.*

**Supplementary Table 4: Effect of diffuse and neuritic  $\beta$ -amyloid plaques, argyrophilic grain disease and vascular pathology on gray matter volume.**

|                            | Diffuse $\beta$ -amyloid plaques | Neuritic $\beta$ -amyloid plaques | Argyrophilic grain disease                    | Vascular pathology         |
|----------------------------|----------------------------------|-----------------------------------|-----------------------------------------------|----------------------------|
| <b>Amygdala L</b>          | 0.1 [-1.9, 2.2], $p=0.90$        | -1.5 [-3.6, 0.7], $p=0.18$        | <b>-6.9 [-11, -2.6], <math>p=0.002</math></b> | 1.4 [-0.8, 3.7], $p=0.21$  |
| <b>Amygdala R</b>          | 0 [-2.1, 2.2], $p=1.00$          | -1.7 [-3.9, 0.6], $p=0.16$        | -2.6 [-7.1, 2.1], $p=0.27$                    | 1.9 [-0.5, 4.4], $p=0.11$  |
| <b>Entorhinal Cortex L</b> | 3.1 [0.2, 6], $p=0.03$           | -3 [-5.9, 0], $p=0.05$            | -7.2 [-12.8, -1.1], $p=0.02$                  | 2.4 [-0.7, 5.6], $p=0.13$  |
| <b>Entorhinal Cortex R</b> | -0.4 [-3, 2.2], $p=0.76$         | -1.7 [-4.4, 1.2], $p=0.24$        | -4.4 [-9.8, 1.3], $p=0.13$                    | 0.9 [-2, 3.8], $p=0.55$    |
| <b>Hippocampus L</b>       | 0.8 [-1.2, 2.8], $p=0.42$        | -0.3 [-2.4, 1.9], $p=0.79$        | -4.3 [-8.4, 0], $p=0.05$                      | 0.9 [-1.3, 3.1], $p=0.42$  |
| <b>Hippocampus R</b>       | -0.3 [-2.4, 1.9], $p=0.81$       | -0.5 [-2.8, 1.9], $p=0.71$        | -2.3 [-6.9, 2.5], $p=0.34$                    | 0.7 [-1.7, 3.2], $p=0.57$  |
| <b>Fusiform L</b>          | -0.8 [-2.7, 1.3], $p=0.46$       | -1 [-3.1, 1.2], $p=0.37$          | -1.4 [-5.6, 3.1], $p=0.54$                    | 2 [-0.2, 4.3], $p=0.07$    |
| <b>Fusiform R</b>          | -1 [-3, 1], $p=0.31$             | 0.2 [-1.9, 2.4], $p=0.85$         | -1.9 [-6.2, 2.5], $p=0.39$                    | 1.7 [-0.5, 4], $p=0.12$    |
| <b>Insula L</b>            | -0.3 [-1.9, 1.3], $p=0.73$       | -0.4 [-2.1, 1.3], $p=0.63$        | -3.3 [-6.6, 0.2], $p=0.07$                    | 0.1 [-1.6, 1.9], $p=0.92$  |
| <b>Insula R</b>            | -0.4 [-1.9, 1.1], $p=0.62$       | -0.5 [-2.1, 1.1], $p=0.54$        | -3.9 [-7.2, -0.6], $p=0.02$                   | 0.6 [-1.1, 2.3], $p=0.49$  |
| <b>Temporal Inferior L</b> | 0.6 [-1.4, 2.7], $p=0.56$        | -2.6 [-4.7, -0.5], $p=0.02$       | -5.7 [-9.8, -1.4], $p=0.01$                   | 1.2 [-1, 3.5], $p=0.28$    |
| <b>Temporal Inferior R</b> | 0.3 [-1.8, 2.4], $p=0.79$        | -1.3 [-3.5, 0.9], $p=0.24$        | -4.4 [-8.7, 0.1], $p=0.06$                    | 2.7 [0.4, 5.1], $p=0.02$   |
| <b>Frontal Middle L</b>    | -1.1 [-3.9, 1.7], $p=0.44$       | -1.1 [-4.1, 1.9], $p=0.47$        | 1.3 [-4.8, 7.9], $p=0.68$                     | -0.8 [-3.8, 2.4], $p=0.63$ |
| <b>Frontal Middle R</b>    | -1 [-3.6, 1.6], $p=0.45$         | -0.8 [-3.6, 2.1], $p=0.58$        | -1.4 [-7.1, 4.7], $p=0.65$                    | 0.7 [-2.2, 3.7], $p=0.63$  |

*Results of the robust regressions showing the effect of diffuse and neuritic  $\beta$ -amyloid plaques, argyrophilic grain disease and vascular pathology on gray matter volume. Values represent the percentage of volume change [95% CIs] associated with each of these continuous variables (apart Argyrophilic grain disease coded in present/absent). Results in bold survived Bonferroni correction for multiple comparisons (red,  $\alpha=0.05$ ,  $p<0.004$ , 14 models considered). L: left; R: right.*

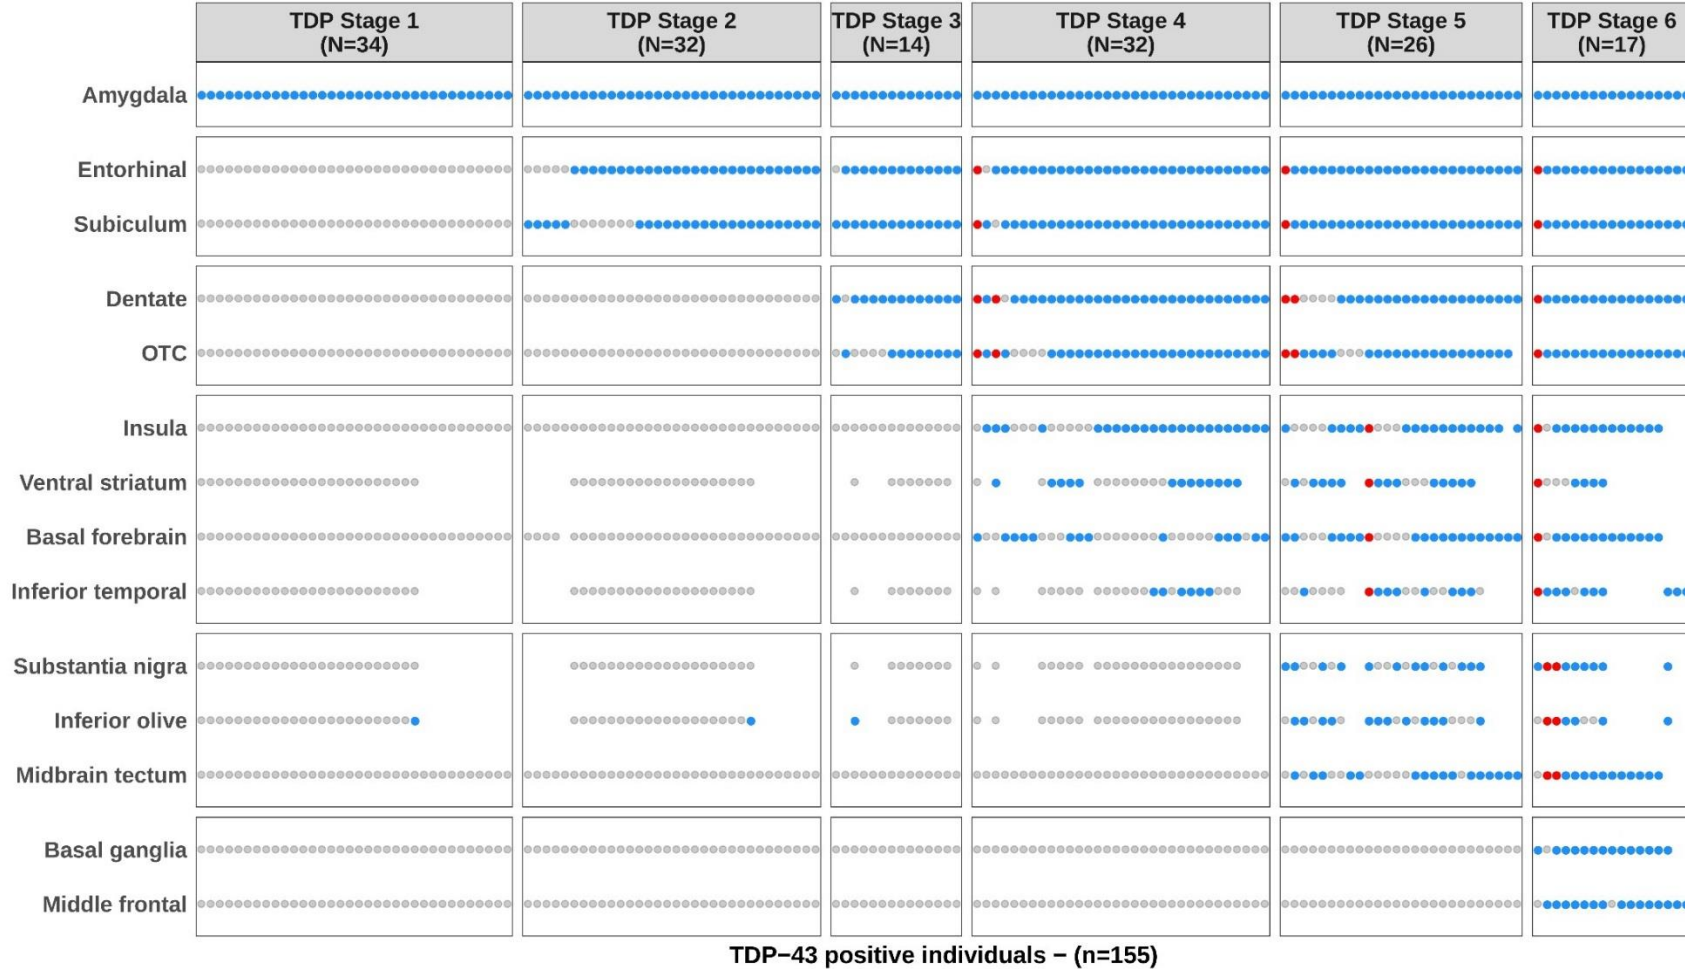

**Supplementary Figure 1: Pathological TDP-43 staging in cases with TDP-43 inclusions.**

Patterns of TDP-43 positivity across 14 regions for the 155 TDP-43 positive cases. Subjects are grouped by TDP-43 stages. Rows represent the brain regions, and columns the subjects (one column per subject). Blue dots indicate the presence of TDP-43 in the region, and gray dot the absence of TDP-43. Red dots indicate skipped regions, i.e. regions negative for TDP-43 but that would have been expected to be positive given subject stage (subjects with at least one stage skipped n=8/155). OTC = occipitotemporal cortex.

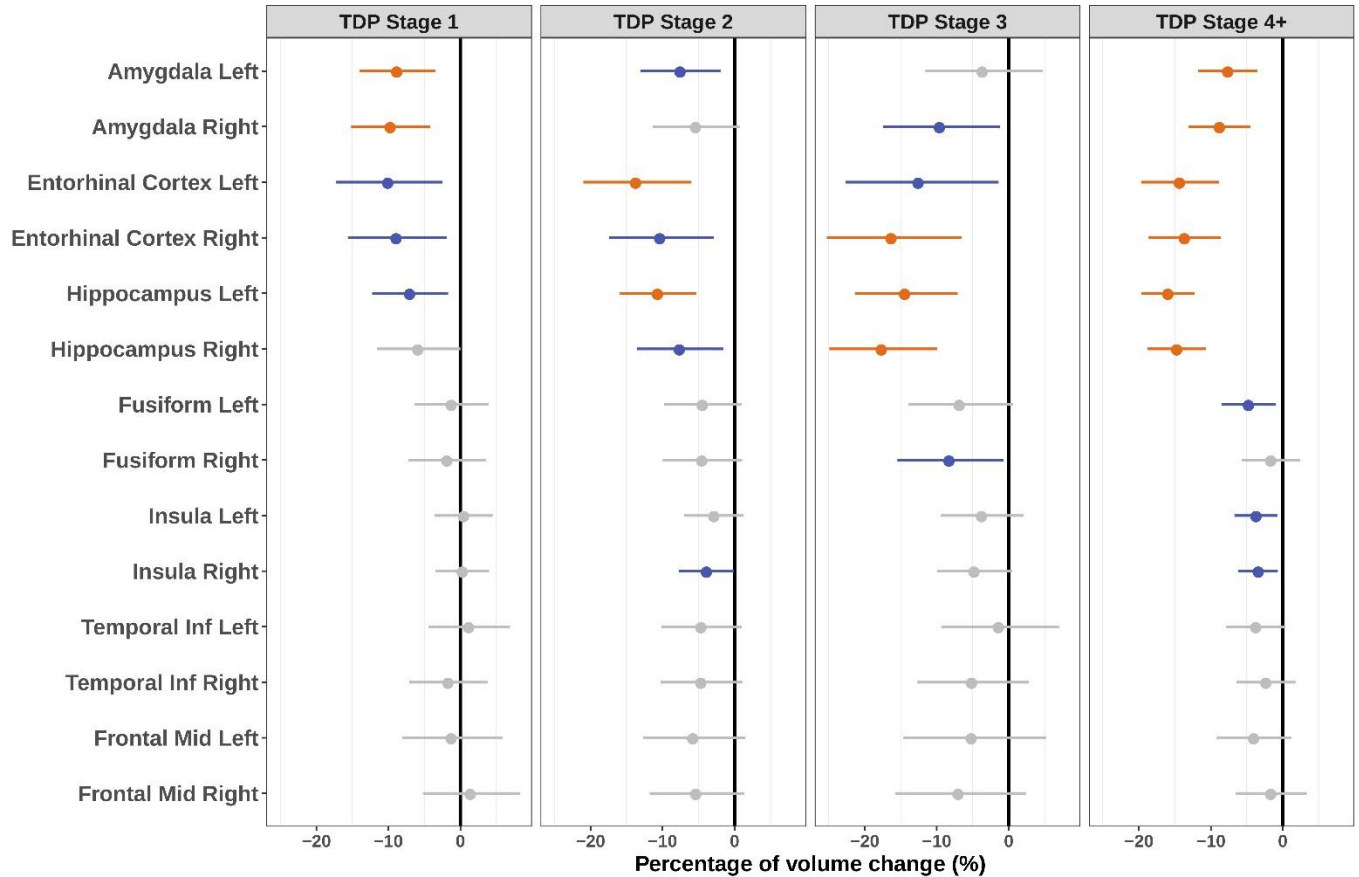

**Supplementary Figure 2: Effect of pathological TDP-43 stages on gray matter volume using a match sample of TDP-43 negative group.**

Values represent the percentage of volume change, with 95% CIs, associated with TDP-43 stages compare to the TDP-43 negative group matched for pathological and nuisance variables (see Results). Colors indicate results that survived Bonferroni correction for multiple comparisons (orange,  $\alpha=0.05$ ,  $p<0.004$ , 14 models considered) or an uncorrected threshold of  $p<0.05$  (blue). Columns indicate the pathological staging and rows the brain regions (i.e., dependent variables) ordered according to their progressive involvement with TDP-43 pathology. Note that the main difference with Figure 1 is that the left ( $p=0.01$ ) and right ( $p=0.01$ ) entorhinal cortex at Stage 1, and the right ( $p=0.008$ ) entorhinal cortex at Stage 2 did not survived Bonferroni correction.



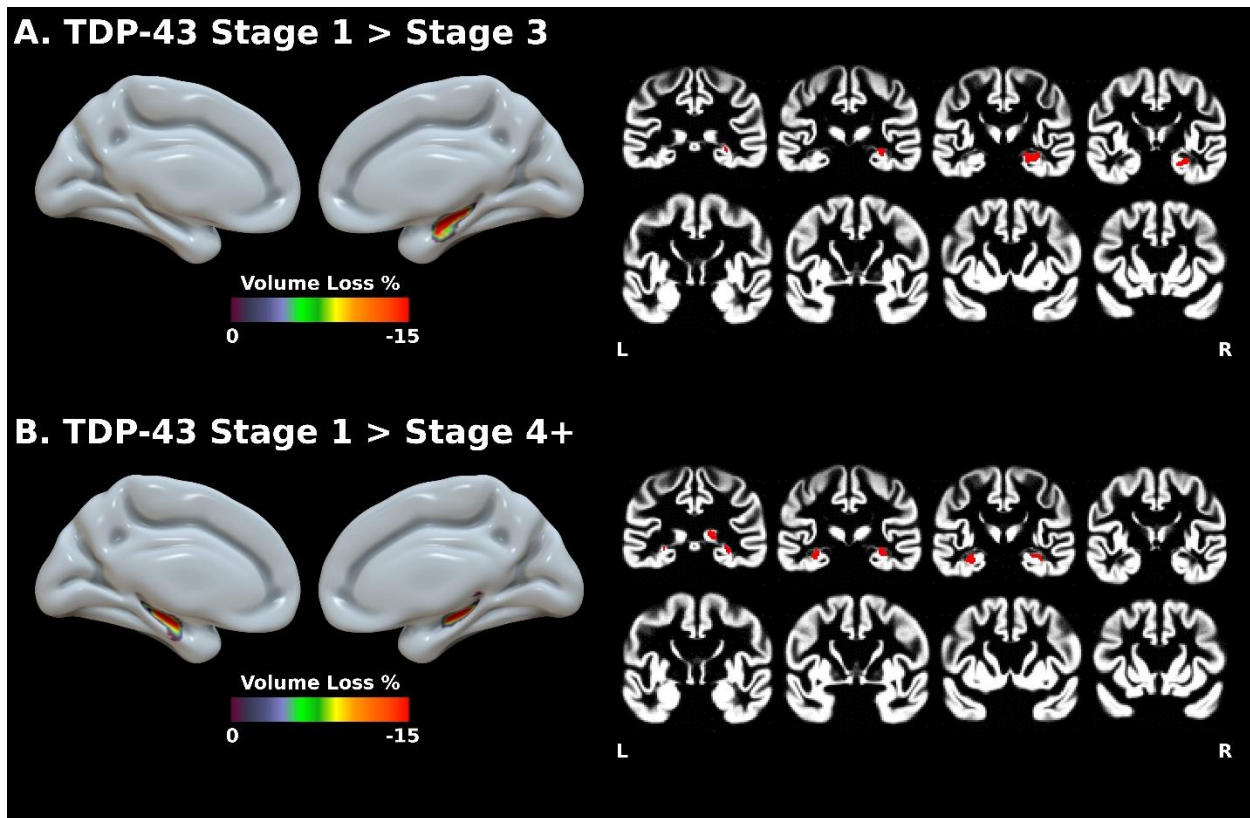

**Supplementary Figure 3: Results of voxel-wise robust regressions showing the significant differences of gray matter volume between TDP-43 stages.**

Values represent the percentage of volume change associated with TDP-43 stage 3 (A.) and 4+ (B.) compared to TDP-43 Stage 1 ( $p < 0.001$  uncorrected,  $k > 500 \text{ mm}^3$ ). Note that no results survived at a threshold of  $p < 0.001$  FDR-corrected,  $k > 500 \text{ mm}^3$ . Results are presented in neurological convention. L: left; R: right.

### A. Braak Stage IV

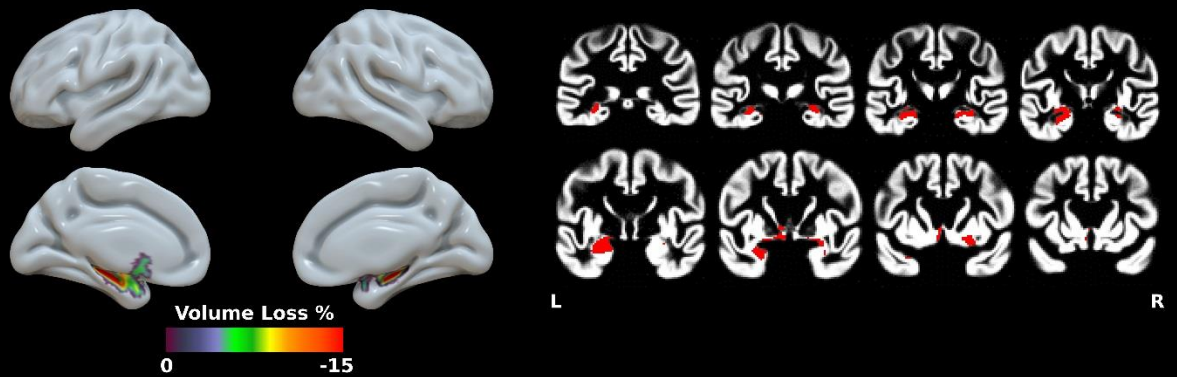

### B. Braak Stage V

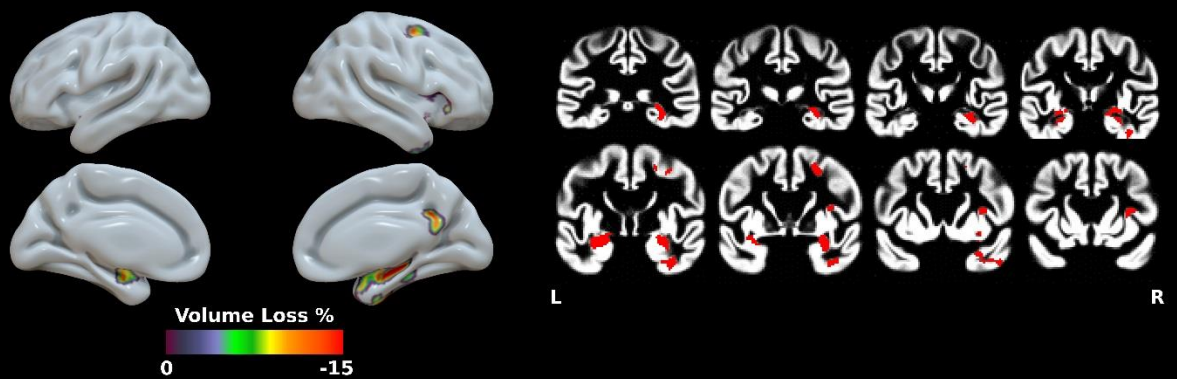

### C. Braak Stage VI

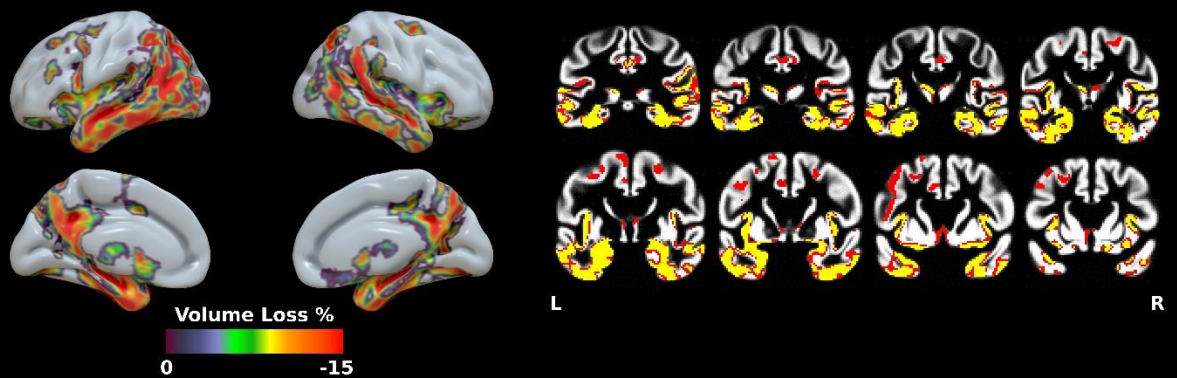

**Supplementary Figure 4: Results of voxel-wise robust regressions showing the effect of Braak stages on gray matter volume.**

Values represent the percentage of volume change associated with Braak stages IV (A.), V (B.) and VI (C.) compared to Braak Stage 0-II. Coronal slices show both  $p < 0.001$  FDR-corrected (yellow) and  $p < 0.001$  uncorrected (red) results ( $k > 500 \text{ mm}^3$ ). Results are presented in neurological convention. L: left; R: right.

### A. Lewy Body Stage 2

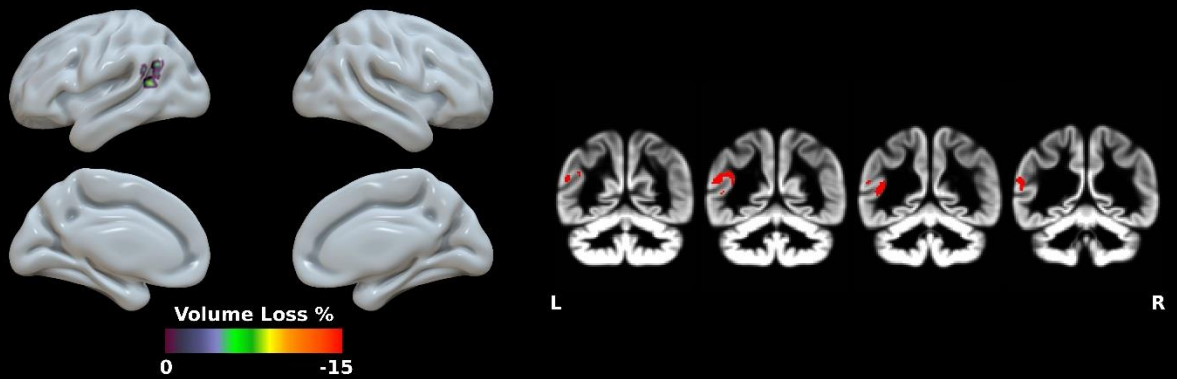

### B. Lewy Body Stage 3

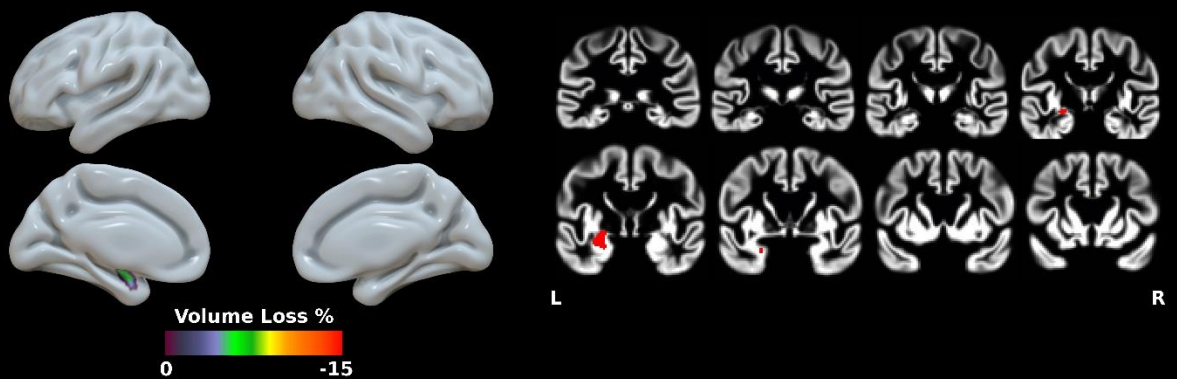

### C. Argyrophilic grain disease

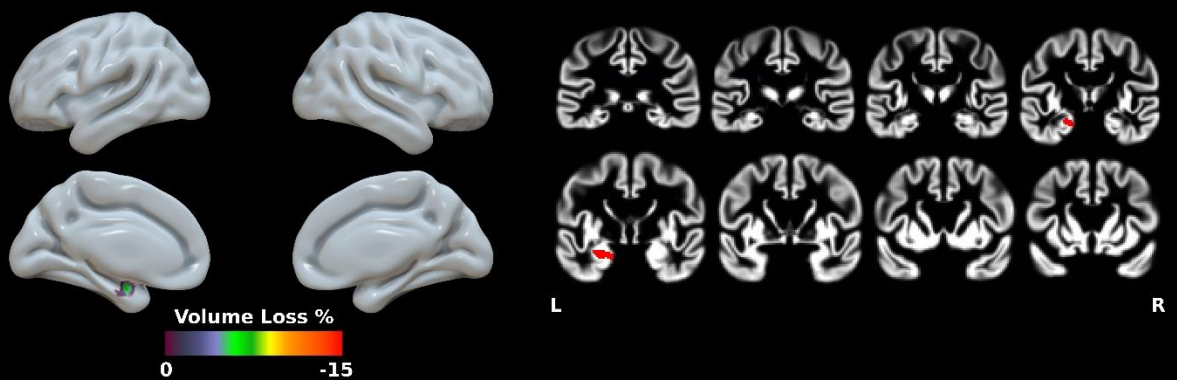

**Supplementary Figure 5: Results of voxel-wise robust regressions showing the effect of Lewy Body stages and argyrophilic grain disease on gray matter volume.**

Values represent the percentage of volume change associated with Lewy Body stages 2 (A.) and 3 (B.) compared to Lewy Body negative individuals, and with argyrophilic grain disease (C.) ( $p < 0.001$  uncorrected,  $k > 500 \text{ mm}^3$ ). Note that no results survived at a threshold of  $p < 0.001$  FDR-corrected,  $k > 500 \text{ mm}^3$ . Results are presented in neurological convention. L: left; R: right.
